# Supplementary material for: A Comprehensive Molecular Interaction Map for Rheumatoid Arthritis
Source: PLOS journal article supplement (doi:10.1371/journal.pone.0010137), 2010-04-16
Supplement: S4 (10.1371/journal.pone.0010137.s004) [file journal.pone.0010137.s004]

# A Comprehensive Molecular Interaction Map for Rheumatoid Arthritis - S4

Table S4. Literature Summary

| Paper*           | Tissue Type | Experiment                                                                | #  |
|------------------|-------------|---------------------------------------------------------------------------|----|
| Alsaleh, '07     | B.PBMC      | Profiling meta-analysis between RA and SLE                                | 5  |
| Andreas, '08     | Cartilage   | Genes of RA related to destruction of cartilage                           | 16 |
| Antonio, '09     | B+PMN       | Identifying genes for rituximab response in RA                            | 3  |
| Arranz, '08      | SF          | Elucidation of the role of VIP in RA                                      | 47 |
| Auer, '07        | S.PMN       | Determining whether PMN can serve as a site for CCL18 production in RA    | 11 |
| Devauchelle, '04 | SF          | New drug targets comparing RA with OA                                     | 5  |
| Edwards, '03     | SF          | Generation of a molecular description of SF comparing RA with OA          | 23 |
| Galligan, '07    | SF          | Gene signatures involved RA and OA                                        | 4  |
| Huang, '08       | SF          | Evaluation of apoptosis-associated genes in SF between RA and OA          | 1  |
| Julia, '09       | SF          | Identifying miRNAs related to LPS-activated RA FLS                        | 4  |
| Junta, '08       | SF          | Evaluation the relationship between profiles of SF from RA patients       | 2  |
| Koczan, '08      | B.PBMC      | Markers for etanercept treatment in RA                                    | 24 |
| Lequerre, '06    | B.PBMC      | Prediction of infliximab responsiveness in RA                             | 2  |
| Lequerre, '06    | B.PBMC      | Identifying candidate gene for the early diagnosis and treatment of RA    | 42 |
| Lindberg, '06    | SF          | Differential activation after treatment with infliximab in RA             | 68 |
| Nakamura, '08    | SF          | Therapeutic effects of HDAC inhibitor combined with ultrasound in RA      | 11 |
| Oki, '09         | SF          | Identification of the molecular mechanisms of bucillamine                 | 61 |
| Olsen, '04       | B.PBMC      | Signature of early RA compared to LS RA                                   | 6  |
| Olsen, '08       | B.PBMC      | Gene expression profiling of PBMC of RA patients with their clinical data | 3  |
| Pohlers, '07     | B.PBMC, SF  | Expression profiling between RA and OA                                    | 6  |
| Sekiguchi, '08   | B+PMN       | Treatment with infliximab in RA                                           | 3  |
| Sha, '03         | SF          | Differential genes between RA and OA                                      | 9  |
| Stanczyk, '08    | SF          | Screening miRNA in RA with TNF $\alpha$                                   | 8  |
| Teixeira, '09    | B.PBMC      | Identifying PBMC gene expression profiles for RA patients                 | 18 |
| Thierry, '09     | SF          | Comparison of profiles of early and LS RA                                 | 43 |
| Timmer, '07      | SF          | Genes expressed in RA with ectopic lymphoid structures                    | 11 |
| Toonen, '08      | B.PBMC, SF  | Genes frequently up- or downregulated in RA                               | 12 |
| Zer, '07         | B.PBMC, SF  | Genomewide studies on the gene targets of p38 MAPK                        | 11 |

\*All authors are et al., # = Number Genes, B.PBMC = Blood.PBMC, S.PMN = Synovial.PMN, B+PMN = Blood.PBMC plus PMN, FLS = fibroblast-like synoviocytes, RA = rheumatoid arthritis, OA = osteoarthritis, LPS = Lipopolysaccharides, SLE = systemic lupus erythematosus, SF = Synovial Fibroblast, VIP = vasoactive intestinal peptide, TNF = tumor necrosis factor, HDAC = histone deacetylase, LS RA = longstanding RA, Gene = Number genes in paper.
